# Supplementary material for: Newly Constructed Network Models of Different WNT Signaling Cascades Applied to Breast Cancer Expression Data
Source: PubMed Central journal article supplement (PMC4669165; doi:10.1371/journal.pone.0144014), 2015-12-03

# Regulation of WNT signaling

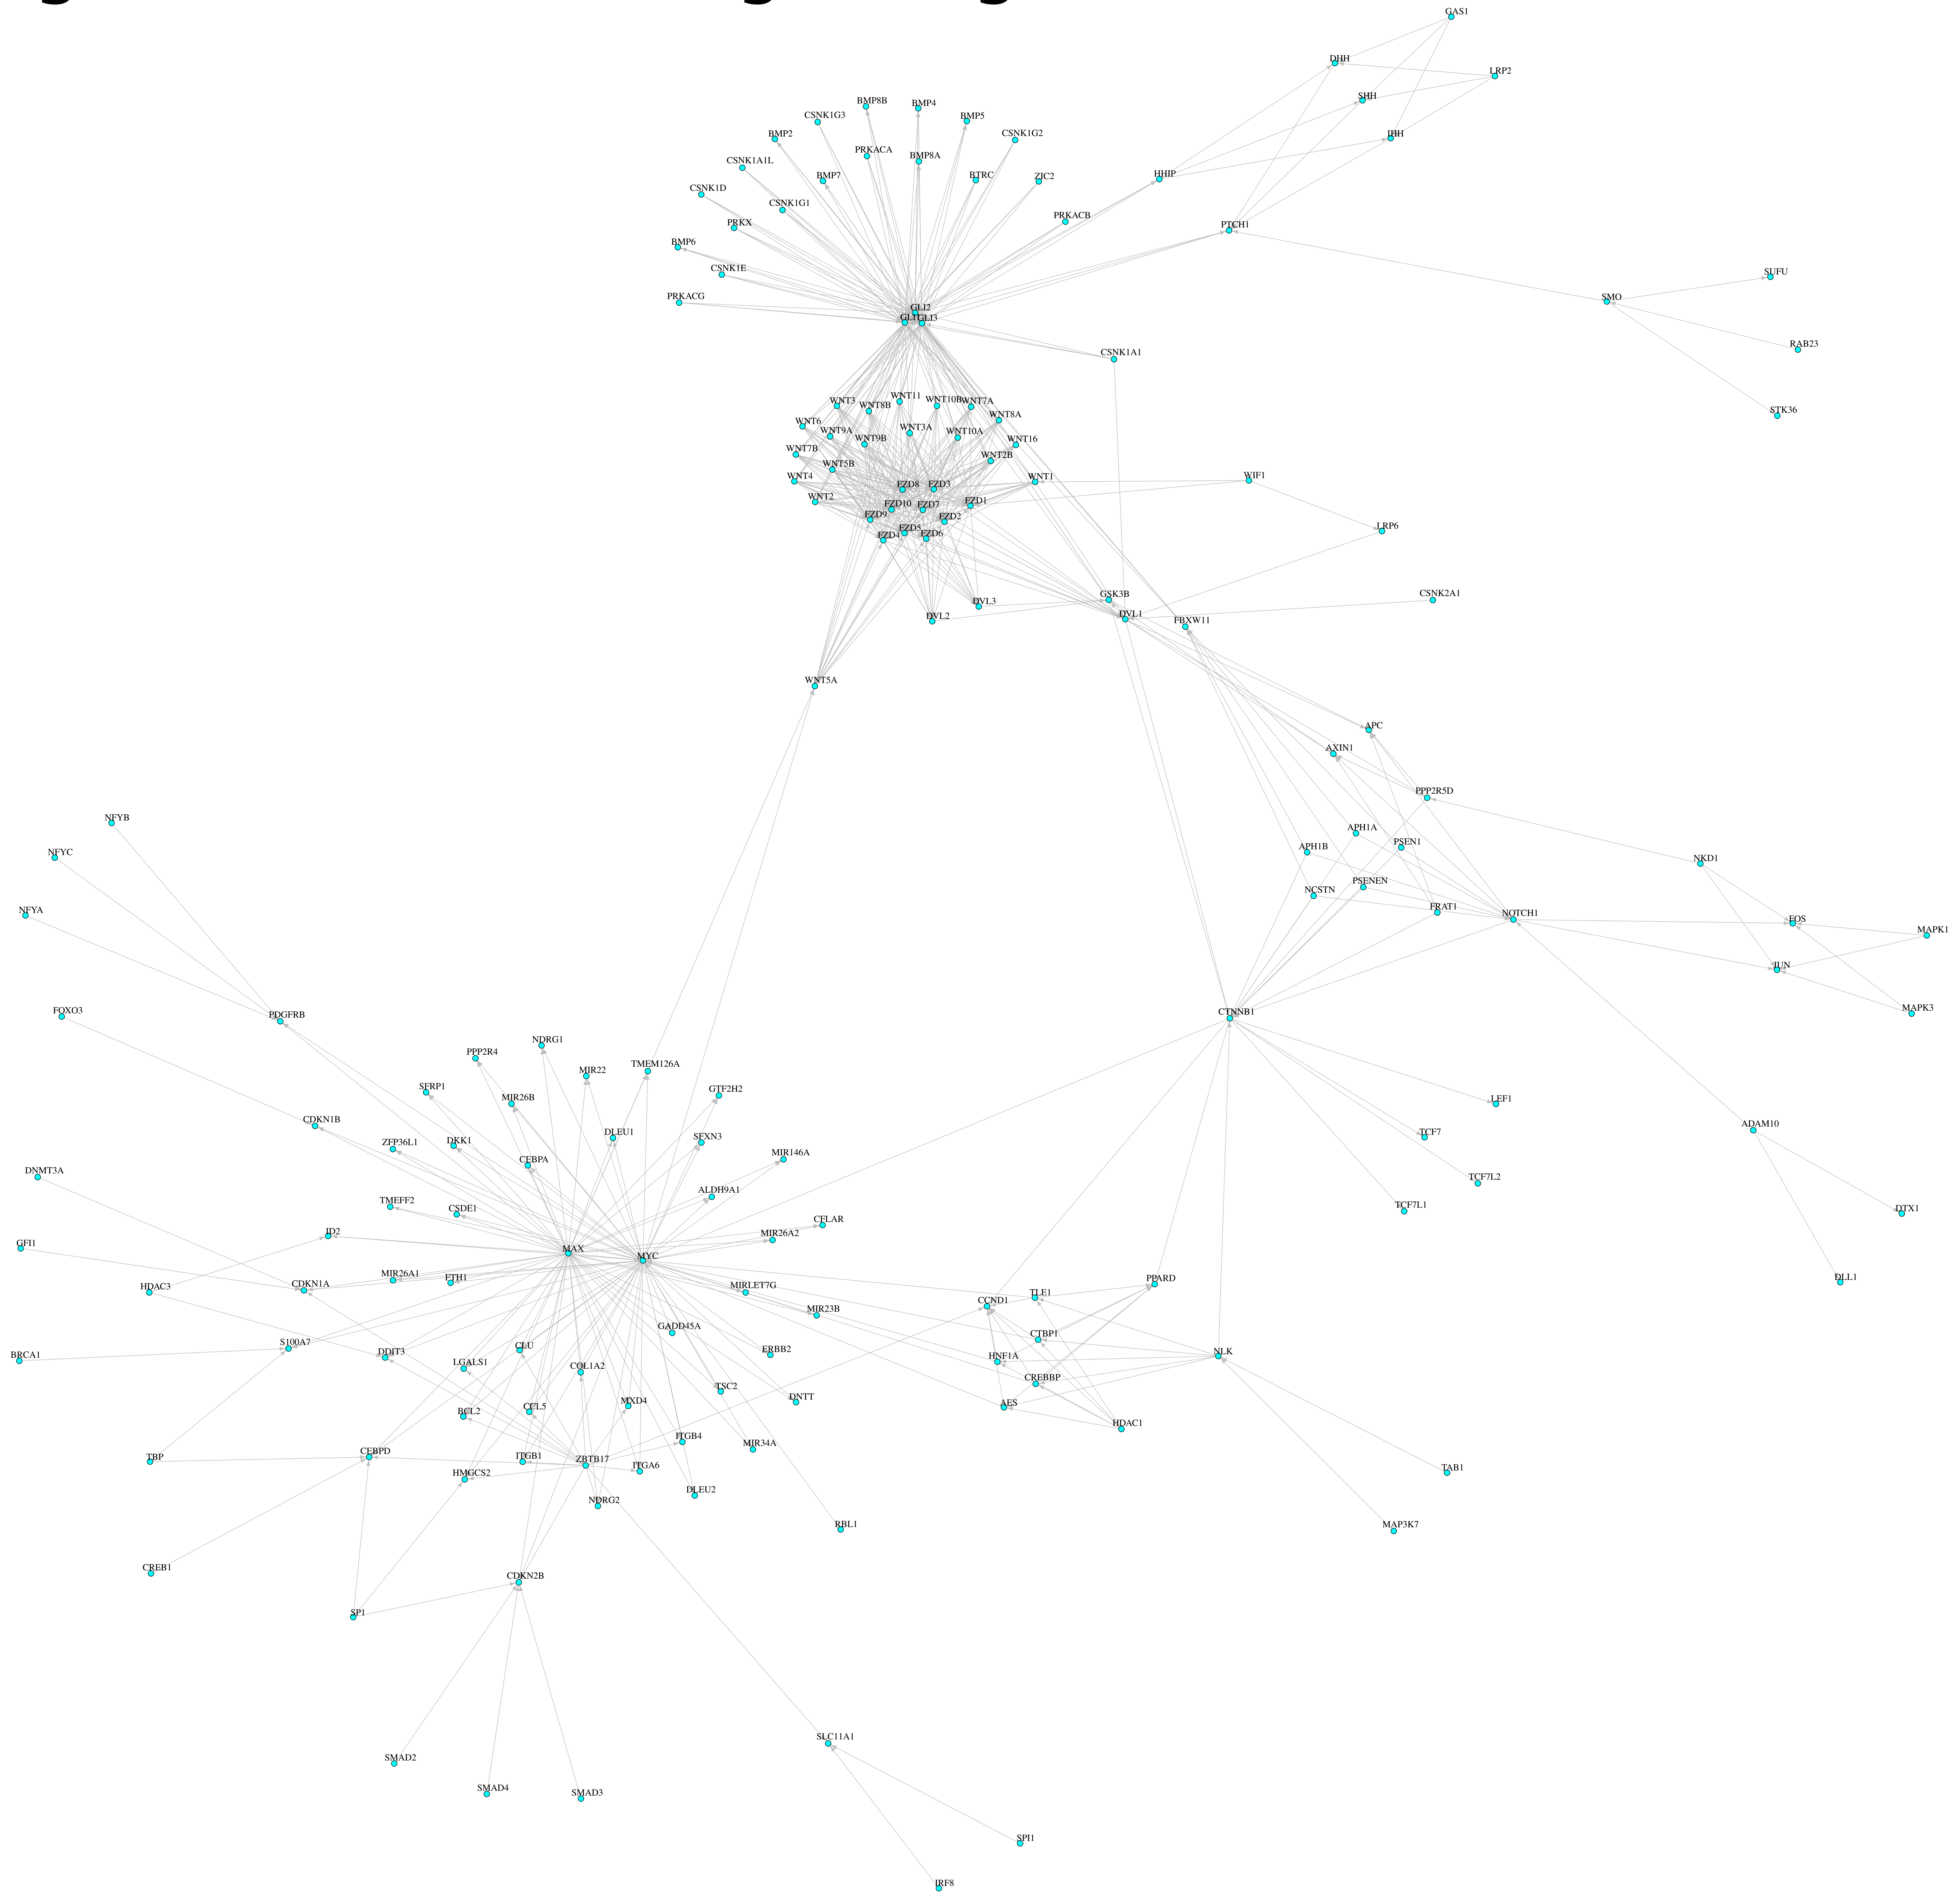

Supplement: pone.0144014.s004.pdf [file pone.0144014.s004.pdf]
